# Supplementary material for: Enhancing the melt stability of polylactide stereocomplexes using a solid-state cross-linking strategy during a melt-blending process
Source: Royal Society of Chemistry journal article supplement (doi:10.1039/c4py00700j), 2014-01-01
Supplement: c4py00700j1.pdf [file c4py00700j1.pdf]

## Electronic Supporting Information

### Enhancing melt stability of polylactide stereocomplexes by using solid-state cross-linking strategy during melt-blending process

*Hongwei Bai<sup>†‡</sup>, Huili Liu<sup>†</sup>, Dongyu Bai<sup>†</sup>, Qin Zhang<sup>†</sup>, Ke Wang<sup>†</sup>, Hua Deng<sup>†</sup>, Feng Chen<sup>†</sup>, Qiang Fu<sup>\*†</sup>*

<sup>†</sup>College of Polymer Science and Engineering, State Key Laboratory of Polymer Materials Engineering, and <sup>‡</sup>College of Light Industry, Textile and Food Engineering, Sichuan University, Chengdu 610065, P. R. China

\* Corresponding author. Tel./Fax: +86 28 8546 1795. E-mail: qiangfu@scu.edu.cn (Q. Fu).

**Table S1.** Thermal parameters of PLLA/PDLA (50/50) blend with and without cross-linker in the first heating run, in the cooling run after melting, and in the second heating run after melting recrystallization.

| Code      | 1st heating run |              | Cooling run |            |             | 2nd heating run   |            |                   |
|-----------|-----------------|--------------|-------------|------------|-------------|-------------------|------------|-------------------|
|           | $T_m$           | $\Delta H_m$ | $T_{c,hc}$  | $T_{c,sc}$ | $T_{m,hc}$  | $\Delta H_{m,hc}$ | $T_{m,sc}$ | $\Delta H_{m,sc}$ |
|           | (°C)            | (J/g)        | (°C)        | (°C)       | (°C)        | (J/g)             | (°C)       | (J/g)             |
| LD        | 233.4           | 70.3         | 128.9/136.4 | 160.6      | 164.6/173.6 | 21.5              | 220.0      | 23.4              |
| LD0.1TAIC | 232.4           | 69.6         | 123.5/132.7 | 161.3      | 163.1/172.1 | 15.2              | 219.5      | 32.1              |
| LD0.2TAIC | 231.6           | 66.7         | 131.2       | 162.5      | 162.1/171.2 | 6.9               | 219.2      | 43.3              |
| LD0.3TAIC | 231.7           | 60.6         | 131.0       | 166.6      | 162.3/171.4 | 3.9               | 219.1      | 44.7              |
| LD0.5TAIC | 231.4           | 58.2         | –           | 173.7      | –           | –                 | 218.5      | 47.5              |
